# Supplementary material for: Decreased Expression of T-Cell-Associated Immune Markers Predicts Poor Prognosis in Patients with Advanced Follicular Lymphoma Received Rituximab Plus Bendamustine
Source: Research Square preprint supplement (doi:10.21203/rs.3.rs-648976/v1), 2021-07-08
Supplement: Supplementary file 1 [file af3c1914c1173d247525645c.xlsx]

## Sheet: Table2
Table 2. Mutation frequencies of recurrently mutated genes in all cases, OR-group, and nOR-group.
Genes	mutation presence	All (n=42)	OR (N=8)	nOR (N=34)	P value
APC n(%)	absence	37 (88.1)	7 (87.5)	30 (88.2)	1
	presence	5 (11.9)	1 (12.5)	4 (11.8)
ARID1A n(%)	absence	40 (95.2)	8 (100.0)	32 (94.1)	1
	presence	2 (4.80)	0 (0.00)	2 (5.90)
BCL2 n(%)	absence	30 (71.4)	7 (87.5)	23 (67.6)	0.402
	presence	12 (28.6)	1 (12.5)	11 (32.4)
CARD11 n(%)	absence	35 (83.3)	8 (100.0)	27 (79.4)	0.312
	presence	7 (16.7)	0 (0.00)	7 (20.6)
CREBBP n(%)	absence	17 (40.5)	5 (62.5)	12 (35.3)	0.235
	presence	25 (59.5)	3 (37.5)	22 (64.7)
EP300 n(%)	absence	36 (85.7)	8 (100.0)	28 (82.4)	0.576
	presence	6 (14.3)	0 (0.00)	6 (17.6)
EP400 n(%)	absence	38 (90.5)	8 (100.0)	30 (88.2)	0.572
	presence	4 (9.50)	0 (0.00)	4 (11.8)
ERBB2 n(%)	absence	38 (90.5)	7 (87.5)	31 (91.2)	1
	presence	4 (9.50)	1 (12.5)	3 (8.80)
EZH2 n(%)	absence	33 (78.6)	8 (100.0)	25 (73.5)	0.168
	presence	9 (21.4)	0 (0.00)	9 (26.5)
FOXO1 n(%)	absence	40 (95.2)	8 (100.0)	32 (94.1)	1
	presence	2 (4.80)	0 (0.00)	2 (5.9)
KMT2D n(%)	absence	26 (61.9)	7 (87.5)	19 (55.9)	0.127
	presence	16 (38.1)	1 (12.5)	15 (44.1)
MEF2B n(%)	absence	29 (69.0)	5 (62.5)	24 (70.6)	0.686
	presence	13 (31.0)	3 (37.5)	10 (29.4)
SYNE1 n(%)	absence	38 (90.5)	7 (87.5)	31 (91.2)	1
	presence	4 (9.50)	1 (12.5)	3 (8.80)
TNFRSF14 n(%)	absence	36 (85.7)	7 (87.5)	29 (85.3)	1
	presence	6 (14.3)	1 (12.5)	5 (14.7)
m7FLIPI n(%)	Low	32 (76.2)	8 (100.0)	24 (70.6)	0.165
	High	10 (23.8)	0 (0.00)	10 (29.4)
