# Supplementary material for: Decreased Expression of T-Cell-Associated Immune Markers Predicts Poor Prognosis in Patients with Advanced Follicular Lymphoma Received Rituximab Plus Bendamustine
Source: Research Square preprint supplement (doi:10.21203/rs.3.rs-648976/v1), 2021-07-08
Supplement: Supplementary file 2 [file b9c8d546561a7442bb122a36.xlsx]

## Sheet: linear
No	Pts No.	1;OR, 2;nOR	POD24 0;yes 1;no	immune infiltrationlow 0;low, 1;high	Response to initial therapy	Response at the end of therapy	Age	1;Male 2;Female	Grade	Stage	6cm＜	7cm＜	B symptoms	Bone marrow involved	Extranodal involved sites	The number of Nodal lesions	GELF	Splenomegaly	GES score	m7FLIPI	FLIPI	FLIPI2	RBC	Hb	Ht	WBC	Neutrophil	Lymphocyte	0;high ALC 1;low ALC	Basophiric	Eosinophiric	Monocyte	Lymphoma cells	PLT	TP	Alb	LD	B2MG	SIL2R	CD4	CD8	Relapse PD 0;no, 1;yes	PFS (days)	Death 0;yes, 1;no	OS (days)	A2M	ABCB1	ABL1	ADA
a-1	13	1	1	0	CR	CR	56	1	2	3	no	no	no	no	no	3	High	no	Low		Low	Int	537	16.1	48.3	4450	2581	1557	1	0	44	267	0	24.8	6.5	4.1	165	1.9	602			0	2169	0	2169	1820.85	449.86	433.3	1207.41
a-2	15	1	1	1	CR	CR	69	2	3a	4	no	no	no	yes	bone,BM	4	High	no	Low	Low	High	High	396	11.3	34.5	3400	1802	996	1	34	238	329	0	24.5	7.3	3.7	260	2.3	885			0	2146	0	2146	1751.47	459.14	398.87	780.01
a-4	19	1	1	1	CR	CR	55	1	2	4	no	no	yes	yes	BM		High	no	Low	Low	Int	Int	457	13.6	39.9	4600	3256	740	0	32	161	409	0	10.8	6.7	4.6	276	5.1	5035			0	227	0	227	1757.69	236.49	393.47	935.64
a-5	20	2	1	0	CR	CR	76	1	3a	3	no	no	no	no	no		Low	no	high	Low	High	Int	396	13	38.1	7260	5815	929	1	0	152	312	50(aty-lym)	19.5	6.7	3.7	274	3.7	1804			0	1980	0	1980	1160.29	200.26	475.77	3323.09
a-6	24	1	1	0	CR	CR	64	2	1	3	no	no	no	no	no	4	High	no	high	Low	Int	High	388	12.3	35.9	3650	1971	1350	1	0	36	292	0	17.5	6.9	4.1	188	2.9	584	37.9	43.3	0	1901	0	1901	1171.62	333.59	460.96	488.26
a-7	33	1	1	0	CR	CR	54	2	3a	3	no	no	no	no	no	4	High	yes	high	Low	Int	Int	473	14.6	42.9	5340	3557	1335	1	0	53	373	0	24	7	4.3	216	1.7	315	52.8	30.7	0	1670	0	1670	1379.29	483.7	388.95	1722.37
a-8	35	1	1	1	CR	CR	65	2	3a	4	no	no	no	yes	BM	7	High	yes	high	Low	Int	Int	453	13.2	39.2	5900	3717	1121	1	0	118	944	0	16.7	7.6	4.4	218	4	3237			0	1616	0	1616	1759.65	299.98	460.95	489.3
a-9	47	1	1		CR	CR	65	2	2	3	no	no	yes	no	no		High	no		Low	High	High	377	10.1	31.6	13900	12510	764.5	0	0	69.5	556	0	35.8	7.7	3	168	2.7	2580			0	1497	0	1497
a-10	48	1	1	0	CR	CR	57	2	2	3	no	no	no	no	no		Low	no	high	Low	Int	Int	472	14.6	42.8	5100	2550	1963	1	25	127	433	0	14.3	7.5	5	232	1.6	403			0	1425	0	1425	2153.6	314.6	585.72	1179.11
a-11	51	1	1	0	CR	CR	70	1	2	3	no	no	no	no	no	4	High	no	Low	Low	Int	Int	427	13	37.4	1030	381	607	0	10	10	20	0	16.1	6.3	3.6	100	2	652			0	274	0	274	2216.47	475.08	365.25	841.16
a-12	1	2	1	1	PR	CR	57	1	1	2	yes	yes	no	no	no		High	no	Low	Low	Int	Int	364	12.7	39.1	9800	7546	1029	1	147	441	637	0	39.2	6.6	4	129	3.5	1025	522	303	0	2379	0	2379	1608.17	1070.42	405.85	708.54
a-13	5	2	1	1	PR	PR	43	2	1	3	no	no	no	no	no	6	High	no	Low	Low	Int	Int	419	12.1	37.7	6500	4030	1690	1	0	260	520	0	24.7	6	3.6	135		724	964	300	0	2302	0	2302	1516.01	437.12	459.86	654.41
a-14	6	2	1	0	PR	CR	57	2	3a	4	no	no	no	yes	BM	8	High	no	Low	Low	High	Int	419	12.3	36.2	6600	5788	528	0	0	19	264	0	34.4	9.1	3.6	214	2.3	1711	320	82	0	2274	0	2274	2429.26	609.94	417.1	495.7
a-15	12	2	1	1	PR	CR	59	1		3	yes	no	no	no	no	5	High	no	Low	Low	Int	Int	414	13.2	40	5700	3950	1003	1	22	267	456	0	20.8	6.4	4.2	187		5612	446	394	0	2194	0	2194	1401.38	275	366.2	701.76
a-16	17	2	1	0	PR	CR	49	2	1	4	yes	yes	no	no	bone	1	High	no	Low	Low	Int	Int	442	13.4	37.7	4000	3116	544	0	8	80	252	0	19.3	6.9	4.6	220	1.8	1928	145	240	0	2109	0	2109	1685.53	425.26	395.99	463.13
b-1	21	2	1	1	PR	CR	57	2	1	2	yes	yes	no	no	no	2	High	no	Low	Low	Low	Int	415	14.4	41.7	7100	4323	1952	1	85	319	418	0	33.2	6.4	3.7	183		2954			0	1979	0	1979	3121.98	541.42	522.04	683.89
b-2	25	2	1		PR	CR	58	2	3a	4	no	no	no	yes	BM	6	High	no		High	High	High	372	11.8	34.8	5300	2983	1372	1	15	121	805	0	14.7	6.7	4	418		6645			0	1897	0	1897
b-3	26	2	1	1	PR	PR	75	2	3a	4	yes	yes	no	yes	BM	6	High	no	Low	Low	High	High	418	13.4	40.1	6700	2994	3417	1	20	67	201	0	19.1	6.2	4.2	207		7103			0	1893	0	1893	1905.13	402.27	419.97	416.75
b-4	29	2	1	1	PR	CR	67	1	2	4	no	no	no	no	Throid,Ileocecal	1	High	no	Low	Low	Int	Int	442	14.1	41.8	9800	4576	4439	1	0	362	421	0	28.7	6.4	3.9	123	2.2	688	2122	1203	0	1757	0	1757	2808.9	401.56	479.08	436.34
b-5	31	2	1	1	PR	CR	68	1	2	4	yes	yes	no	yes	BM	6	High	no	Low	High	High	High	492	15.9	44.8	6000	3234	1608	1	42	552	564	0	10.1	7.4	4.2	253	2.1	1327	496	427	0	1706	0	1706	1904.61	532.24	388.73	892.81
b-6	34	2	1	1	PR	CR	57	2		4	yes	yes		yes	BM	2	High	no	Low		Int	Int	430	13.4	39.2	5600	3639	1304	1	16	95	487	0	33.1	6.6	4.4	229	1.9	899			0	1670	0	1670	2500.71	442.14	452.53	1247.99
b-7	36	2	1	0	PR	CR	60	1	1	4	yes	no		yes	BM,PB	8	High	no	high		High	High	466	14.7	44.9	21900	3744	3942	1	65	941	941	12198	22.9	6.1	3.5	215	4.8	9430			0	1602	0	1602	1247.4	158.87	400.11	382.46
b-8	37	2	1	1	PR	PR	66	1	3a	4	yes	yes	no	yes	BM	3	High	no	Low	Low	Int	High	429	14.1	41.7	5500	3410	1320	1	16	203	533	0	21	6.7	3.7	196	1.9	901	671	423	0	1602	0	1602	2860.1	269.54	431.1	1005.65
b-9	38	2	1	1	PR	PR	76	1	2	4	yes	yes	no	yes	BM	2	High	no	Low	Low	High	High	443	10.1	33.7	5400	3277	1274	1	43	307	486	0	24.9	6.4	4.6	208	2.8	4732	503	379	0	1644	0	1644	2222.4	652.11	388.14	737.67
b-10	39	2	1	0	PR	CR	74	1	3a	4	yes	no		yes	PB,BM	7	High	no	high		High	High	392	11.5	35.8	7000	4571	1071	1	70	168	511	560	28	6.4	3.9	156	2.7	1869	267	148	0	1590	0	1590	1248.61	339.07	412.39	384.13
b-11	40	2	1	1	PR	CR	74	2	2	3	no	no	no	no	no	6	High	no	Low	High	High	Int	398	12	37.1	3900	2195	1482	1	27	66	128	0	17.1	7.4	4.2	198	2.8	931	868	417	1	1416	0	1567	1758.04	486.63	416.43	688.6
b-12	44	2	1	1	PR	CR	74	2	1	2	no	no	no	no	no	1	High	no	Low	Low	Int	Int	427	12.8	38.2	4300	3027	881	1	25	73	292	0	16.1	7.4	4.6	220	2.2	733			0	1534	0	1534	2209.45	414.69	409.12	615.35
b-13	45	2	1	1	PR	CR	66	1	2	3	no	no		no	no	3	High	no	Low	High	High	Int	474	14.8	43.8	4300	2554	1393	1	17	77	262	0	13.6	7.4	4.7	214	1.8	665			0	1531	0	1531	2021.88	341.2	344.46	609.75
b-14	46	2	1	1	PR	CR	40	2	2	4	yes	yes	yes	no	Bone		High	yes	Low	High	High	High	362	10.5	31.9	7900	5569	1264	1	15	355	711	0	23.2	6	4.1	400	4.2	7190			0	1506	0	1506	2575.44	444.56	506.5	810.19
b-15	49	2	1	0	PR	CR	43	1	2	4	yes	yes	yes	yes	BM	3	High	no	high	Low	Int	Int	511	16.1	47.1	5500	2497	2117	1	60	396	429	0	16.3	6.4	4.3	229	1.49	940	1406	347	0	1412	0	1412	1433.48	267.16	451.01	696.15
b-16	52	2	1	0	PR	CR	66	1	1	3	no	no	no	no	no	7	High	no	Low	High	High	Int	446	15.2	45.9	7100	4402	1959	1	28	156	560	0	20.3	7.4	4.6	176		792			0	1383	0	1383	1807.65	365.42	335.74	1447.35
c-1	53	2	1	0	PR	CR	61	2	2	4	yes	yes	no	yes	BM,PB	4	High	no	Low	Low	High	High	388	11.7	35.9	4000	2016	1348	1	12	280	240	52	23.2	7.1	3.8	303	2.2	3638			0	1362	0	1362	3350.52	457.47	372.16	453.21
c-2	55	2	1	1	PR	CR	61	2	2	4	no	no		yes	BM	5	High	no	high	Low	High	High	435	13.1	39.8	5300	2082	2798	1	15	174	227	0	21.9	6.2	4	129	2.6	1518			0	1345	0	1345	1600.65	423.35	464.8	486.51
c-3	56	2	1	1	SD	CR	55	1	3a	4	no	no	no	no	small intestine	2	High	no	Low		Low	Int	548	13.3	41.7	4340	2951	725	0	43	256	364	0	18.9	7.4	4.7	213	1.8	580			0	1299	0	1299	2753.35	507.54	365.54	1375.36
c-4	58	2	1	0	PR	CR	68	2	2	4	yes	yes	no	yes	BM	2	High	no	Low	Low	Int	High	449	13.5	43.6	4320	2544	1265	1	8	95	406	0	18.8	7.2	4.1	190	2.3	4070			0	1226	0	1226	1612.53	272.81	437.11	763.67
c-5	60	2	1	0	PR	CR	68	2	1	4	no	no	yes	yes	BM	3	High	no	Low	Low	Int	Int	448	13.7	41	2710	1360	869	1	29	149	300	0	7.7	6.8	4.1	174	1.8	604			0	1131	0	1131	1614.53	414.71	460.09	546.62
c-6	3	2	0	0	PR	CR	62	1	3a	4	no	no	no	yes	BM		High	no	high	Low	Int	High	466	15.1	44.9	7300	4934	1000	1	29	467	860	0	8.9	6.8	4.1	201	3.2	4849			1	320	0	791	1217.79	273.82	477.03	899.29
c-7	4	2	1	0	PR	CR	69	2	2	3	no	no		no	no		High	no	high	Low	Int	Int	383	12.6	36.7	1770	1320	389	0	10	30	19	0	9.1	5.6	3.7	175	2.4	671			1	986	1	1349	1220.4	362.82	531.4	692.66
c-8	9	2	0	0	PR	PR	74	2	3a	4	yes	yes	no	no	thyroid,skin	7	High	no	Low	Low	High	High	280	8.7	24.2	4900	3136	602	0	0	63	1063	34(reactive)	12	5.2	2.7	456		10823			1	354	1	495	1017.1	219.47	535.75	926.74
c-9	10	2	1	0	SD	CR	36	2	1	3	yes	yes	yes	no	no	8	High	yes	high	Low	Int	Int	414	12.8	37.2	4940	3556	1136	1	0	98	148	0	20	7.3	4.6	172		2145			1	765	0	2194	956.3	253	472.21	726.13
c-10	11	2	1	1	PR	CR	73	1	2	4	no	no	no	yes	BM,bone,PB	9	High	no	Low	High	High	High	408	13.7	39.3	4000	2244	972	1	0	480	292	12	12.1	5.9	3.9	183		2307	356	469	1	796	1	1943	2158.67	525.53	435.73	822.67
c-11	14	2	1	1	PR	CR	69	2		4	no	no	no	yes	lever,bone,BM	5	High	no	Low	Low	High	Int	501	14.9	43.1	6000	4200	1422	1	0	18	360	0	22.2	7.4	4.6	195	1.9	1202			1	844	0	1169	2568.2	538.21	478.69	630.65
c-12	22	2	0	0	PR	PD	71	1	2	4	no	no	yes	yes	BM		High	no	Low	High	High	High	417	12.6	38.6	7100	5985	475	0	0	21	617	0	19.9	6.2	3.1	3698		18937			1	122	0	241	1929.76	421.2	369.7	700.48
c-13	28	2	0	0	PR	PD	65	2	2	3	no	no	no	yes	BM		High		high	High	High	High	401	11.3	33.5	4100	3128	479	0	28	123	340	0	10.8	6	3.5	214		7414	241	92	1	447	0	975	1302.66	359.03	448.32	860.92
c-14	43	2	0	0	PR	CR	68	1	2	4	no	no	yes	yes	BM	6	High	no	Low	Low	High	High	399	12.9	37.3	3600	2437	565	0	36	35	309	0	24.4	6.4	4.1	195	2.6	4562	187	167	1	635	0	1539	9328.67	541.84	1177.09	795.41
c-15	50	2	0	0	PR	CR	58	2	2	4	no	no	no	yes	BM	9	High	yes	high	High	High	High	365	10.2	31.8	7400	3159	1541	1	170	828	592	940	17.5	7	4.1	277	6	17802	952	521	1	628	0	1310	1423.95	230.69	397.45	2119.72
c-16	54	2	0	0	PR	PD	59	2	1	4	no	no		yes	BM	2	High	no	Low	Low	High	High	360	11.8	34.3	4100	3095	463	0	53	233	233	0	21.5	5.9	3.4	906	2.3	1111			1	163	1	611	2704.24	308.41	440.7	684.18
d-1	16	2	1	1	PR	CR	75	2	1	3	no	no	no	no	no	3	High	no	Low		Int	Int	395	12.3	36.2	4030	2538	1209	1	0	40	241	0	16.6	7.3	4.6	219		750			1	1071	1	1071	1967.24	375.58	574.83	896.59
d-2	23	1	0	0	CR	CR	58	1	2	3	no	no	no	no	no	4	High	no	high		Int	Int	464	13.8	40.1	4530	2989	1313	1	0	90	135	0	16.6	7.5	4.4	230	2	1959	602	285	1	482	0	1910	1999.79	328.31	516.21	875.49
d-3	27	2	0	0	PR	PD	65	2	2	4	yes	yes	no	yes	BM		High	no	Low		High	High	421	13.6	40.2	4150	2905	830	0	0	83	332	0	24.2			173	1.85	1960			1	96	0	1778	1314.27	227.94	532.6	1539.98
[truncated: 830 more columns]
